# Supplementary material
Source: PubMed Central journal article supplement (PMC4468634)
Supplement: supp_mol.114.097485_Supplemental_Data_97485.pdf [file supp_mol.114.097485_Supplemental_Data_97485.pdf]

## Supplemental Data

### Molecular Pharmacology

#### Anti-obesity effect of a small molecule repressor of ROR $\gamma$

Mi Ra Chang, Yuanjun He, Tanya Khan, Dana S. Kuruvilla, Ruben Garcia-Ordonez, Cesar Corzo, Thaddeus J Unger, David W. White, Susan Khan, Li Lin, Michael D. Cameron, Theodore M. Kamenecka, and Patrick R. Griffin

| Gene name<br>( <i>Mus musculus</i> ) | Forward (5'to 3')                      | Reverse (5'to 3')                 |
|--------------------------------------|----------------------------------------|-----------------------------------|
| <i>aP2 (FABP4)</i>                   | AAG GTG AAG AGC ATC ATA ACC CT         | TCA CGC CTT TCA TAA CAC ATT CC    |
| <i>AdipoQ</i>                        | TGT TCC TCT TAA TCC TGC CCA            | CCA ACC TGC ACA AGT TCC CTT       |
| <i>FGF21</i>                         | AGC TCT CTA TGG ATC GCC TCA CTT        | ACA CAT TGT AAC CGT CCT CCA GCA   |
| <i>ROR<math>\alpha</math></i>        | CCA GCT TCC AGT CAG TGG TTA            | TGC TCT GGG TCT CGA TGG T         |
| <i>ROR<math>\gamma</math></i>        | CCC GCC ACT CTA TAA GGA ACT CT         | AGG GCT GAA GGA AAT AGA AAG TTG T |
| <i>PPAR<math>\gamma</math></i>       | ACA AGA CTA CCC TTT ACT GAA ATT ACC AT | TGC GAG TGG TCT TCC ATC AC        |
| <i>UCP1</i>                          | ACT GCC ACA CCT CCA GTC ATT            | CTT TGC CTC ACT CAG GAT TGG       |
| <i>PGC1<math>\alpha</math></i>       | CCC TGC CAT TGT TAA GAC C              | TGC TGC TGT TCC TGT TTT C         |
| <i>PRDM16</i>                        | CAG CAC GGT GAA GCC ATT C              | GCG TGC ATC CGC TTG TG            |

**Supplemental Figure 1.** Primer sequence for Q-PCR analysis

A.

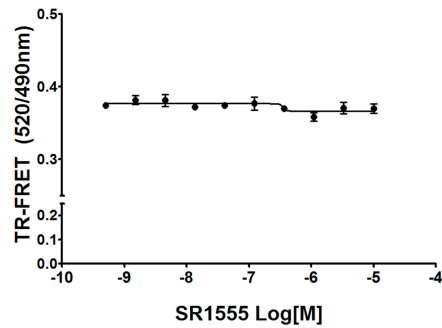

B.

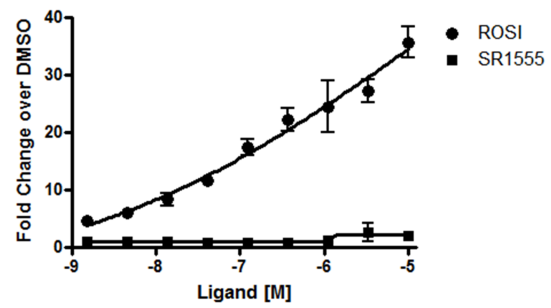

**Supplemental Figure 2.** PPARG activity (A) LanthaScreen PPARG TR-FRET competitive binding (B) 293T cells were cotransfected with Gal4 PPARG along with UAS-luciferase plasmid. The cells were treated for 20hr with indicated concentration of SR1555 or positive control rosiglitazone (ROSI). Relative fold change was determined by normalizing to cells treated with DMSO only (no compound). Each data point was performed in 6 replicates and represented as mean  $\pm$  SEM, n=6.

| Time (hr) | 5mg/kg IP [plasma] $\mu\text{M}$ | 10mg/kg IP [plasma] $\mu\text{M}$ | 20mg/kg PO [plasma] $\mu\text{M}$ |
|-----------|----------------------------------|-----------------------------------|-----------------------------------|
| 0.25      | 4.0 $\pm$ 0.1                    | 5.3 $\pm$ 0.2                     | 4.4 $\pm$ 0.1                     |
| 0.5       | 6.3 $\pm$ 0.5                    | 8.9 $\pm$ 0.7                     | 8.6 $\pm$ 0.7                     |
| 1         | 6.8 $\pm$ 0.6                    | 11.5 $\pm$ 0.4                    | 13.6 $\pm$ 1.7                    |
| 2         | 5.7 $\pm$ 0.1                    | 11.6 $\pm$ 0.1                    | 16.3 $\pm$ 0.1                    |
| 4         | 4.1 $\pm$ 0.4                    | 8.9 $\pm$ 1.0                     | 16.6 $\pm$ 2.8                    |
| 6         | 2.7 $\pm$ 0.6                    | 5.9 $\pm$ 3.4                     | 12.4 $\pm$ 1.7                    |
| 8         | 1.8 $\pm$ 0.3                    | 4.3 $\pm$ 0.4                     | 9.8 $\pm$ 1.7                     |
| 24        | 0.1 $\pm$ 0.0                    | 0.3 $\pm$ 0.1                     | 0.7 $\pm$ 0.3                     |

**Supplemental Figure 3:** *In vivo* plasma drug exposure of SR1555 from bolus administration of compound at 5mg/kg IP, 10mg/kg IP, and 20mg/kg via oral gavage. N=3

| Dose       | T <sub>1/2</sub><br>hr | T <sub>max</sub><br>hr | C <sub>max</sub><br>μM | AUC <sub>last</sub><br>μM*hr | Cl <sub>obs</sub><br>ml/min/kg |
|------------|------------------------|------------------------|------------------------|------------------------------|--------------------------------|
| 20mg/kg PO | 4.3                    | 3.3                    | 17.0                   | 191                          | 3.8                            |

**Supplemental Figure 4:** Calculated PK parameters. Plasma concentrations after oral gavage dosing of 20 mg/kg SR1555 were determined and fit to a noncompartmental model in WinNonlin.

A.

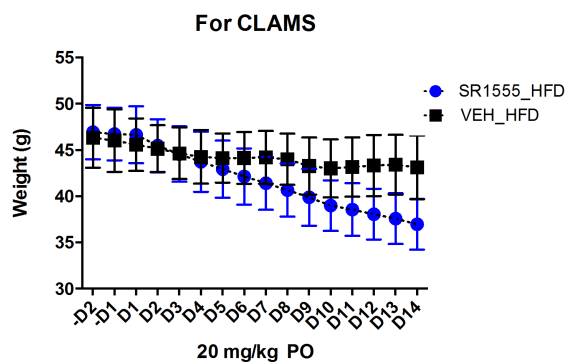

B.

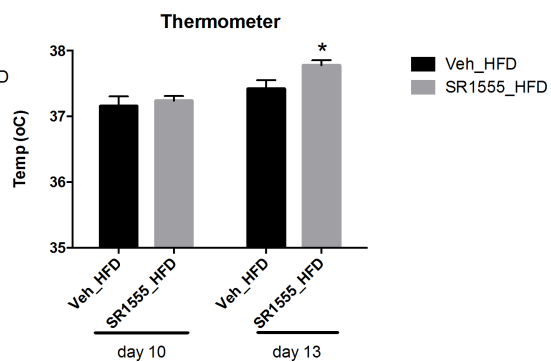

**Supplemental Figure 5:** DIO mice were administered SR1555 20mg/kg orally 14 days. A) Body weight and B) body temperature at days 10 and 13. Body temperature was recorded with a rectal probe connected to digital thermometer (BA T-12 Microprobe-Thermometer, Physitemp, Clifton, New Jersey, USA).

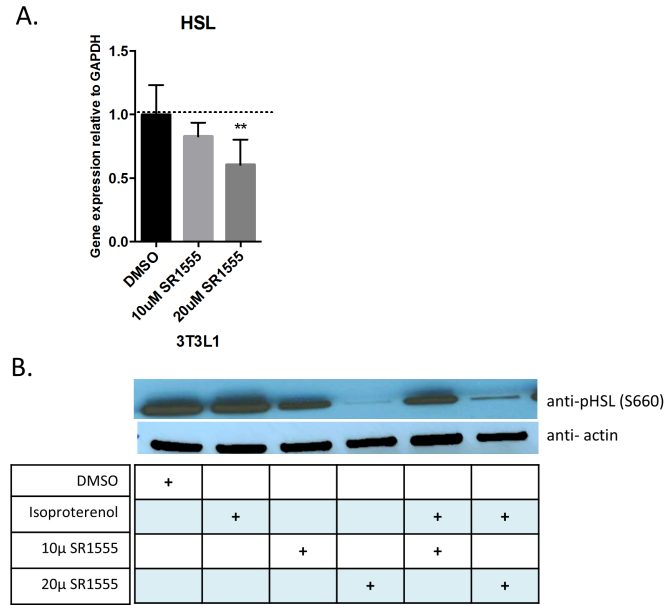

**Supplement Figure 6.** HSL activity. Differentiated 3T3L1 cells were incubated with 10µM isoproterenol for 30min to stimulate lipolysis. Relative mRNA level was measured by qPCR (A) and phosphorylated HSL (Ser660) was detected by western blot and actin was used for control (B)

A.

| Seq. name | Accession no. | Gene symbol | Start position | End position | Strand | Consensus Sequence |
|-----------|---------------|-------------|----------------|--------------|--------|--------------------|
| Promoter1 | NC_000073     | Lipe        | 238            | 244          | +      | ATTTGGG            |
| Promoter1 | NC_000073     | Lipe        | 348            | 354          | -      | ATCTGGG            |
| Promoter1 | NC_000073     | Lipe        | 431            | 437          | -      | AAATAGG            |
| Promoter1 | NC_000073     | Lipe        | 549            | 555          | +      | AAGTGGG            |
| Promoter2 | NC_000073     | Lipe        | 397            | 403          | +      | AACTGGG            |
| Promoter2 | NC_000073     | Lipe        | 607            | 613          | +      | AACTAGG            |
| Promoter2 | NC_000073     | Lipe        | 874            | 880          | +      | AAGTGGG            |
| Promoter3 | NC_000073     | Lipe        | 456            | 462          | -      | AACTGGG            |

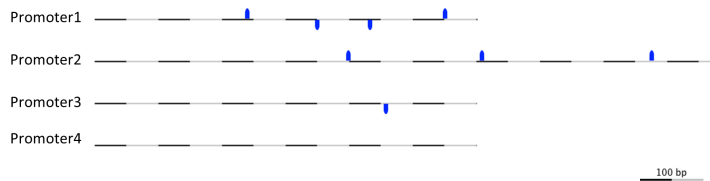

B.

- >Promoter1|sym=Lipe|taxid=10090|spec=Mus musculus|chr=7|ctg=NC\_000073|str=(-)|start=26183628|end=26184229|len=602|comm=Promoter Region  
 AGGGTTTGAGCCTATAAAAACAGGATGGTATGTGCTTTGTTTTGTTTTGTTTCTTTTAGTAGGAGGTATAAAATGAT  
 CAGAGCAACAGTCTAAGACAATTCAAAAGGCAACCAAGTTGTAAGAATGAATGAAAAGGAACTATGATTAAGATATAA  
 AGACTCTTAAGTATTCCTCTGGTATCAGGAGGGGAAAAGTACTGAACATAAGTGGTACACACCTGTGGTACAGAAAT  
 TGGGAAATGAAGACAGGAAGAAATAGTAGCTTGAGGCCAGCTGGGCTACATGAATTTCCATCTCTGGGGTAGGGA  
 CCACTCATAGCTCACCTAGAATCTCCAGATGAAACAGAAAGACTAAGATACTGCCCTTAGAGAAGGTCACCTGTGC  
 ATTTTAATGAGTGGTGAAGTGGGGCGGGCCCTATTTAGACAAGAGAAAGCCCTCCCTCTTGAAGACAGTAC  
 TGGGACATGAGCCCTCTCTAGTCTAATCCCTCTCCAAAGAGACACAGAGATCACCTGGCAAGATGGGGACCA  
 CGAGTGATAAACTCAGATCAGCTATAAAGGAAGATCAGGA
- >Promoter2|sym=Lipe|taxid=10090|spec=Mus musculus|chr=7|ctg=NC\_000073|str=(-)|start=26180906|end=26181898|len=993|comm=Promoter Region  
 CTCAGCCCGTGGAAATGACTAGATTTTCATGGGGTAGAGAAGCTTGGGAGCAGGGCTGGTAGGGCTCAGAGGCTGTG  
 GCAAGATCCAGCGGAAATGGAAACAGCGTAGTGAAGTGCTGGTGAAGCTGTGGCGCTTCTCTGCCCTCTCCGAAGC  
 AATGGCAGGTAAACAGCCATAGGACCCAGTCTTGAACAGGAGAGAGGAAAGTCAAGTCTGAGGGCCGTAGTGAATGGT  
 CTTTCCACTCAGAGGGCCCTCCCTCTCCAAAAGCTGAGAGGTTTCTCCGAGGACAGAAATTAATGCTCACTCTG  
 TCAAAGAAAATCGAGGCTTAATCCTCCAGGGCAGCCGGTCCAGAAGCTTCTGGCATGGGCAACCCAGAAGCAACT  
 GGGAGCAGTGAAGCTGTGGCATGTGGCAGTCTGGGCTCCTCTGTTTCCCGCTTTCGGGGCACGTGGGCTCC  
 CTGCACTACGCTCTTCTGTAGATCAACCTGAGGCCGGGTGTTGCTGTCTTCCCTTCTTTGATTCTGGGGAA  
 TAAGGCAGGCGAGAGGAGAGACACCTCATGAAGCAGAGCAAGAACTAGGAGGAGCGCGGATGTGAGACTGGAAG  
 TAGTTTGTCTGAGAGGCCAAGGCCACCTCACTAAGCTAGGACCTGTCTGGGGGGAAAAAAGAAAAAAGAAAAA  
 AAAAAACAGGGACGACAGTGAAGGGGGCGAGGAAAGGGCGGGCTTCTCCAAACGGCTACCAAGCGGGTACGCC  
 CCAAGTGGTCTCCAGGCTTGGGTTGCGGCTTCTGGGCTCCCGCTTCTGGGCTCCCGGAGCAAGTGCAC  
 CGGGCAGGTTCAAGAAAAGTGAATGAGATGGCGAGGGTCAACCTGCACAGATGACTGAGAATCTTTGTTGGGT  
 GACTCAACGCACTCCTCACTATCTCTGCT
- >Promoter3|sym=Lipe|taxid=10090|spec=Mus musculus|chr=7|ctg=NC\_000073|str=(-)|start=26175025|end=26175625|len=601|comm=Promoter Region  
 ACAGCAGGGCTGGCACTCTTTCCCTAACAGCTGGAGACATCTGTCCAGGGCCAATGTGGGAGGGGGGAATTGGC  
 ATAACCTAGCCTTGGCTCCGAATCACTTGGGGAGAGGAGAGGACAGCTTCTGGGGAGAGGGGACAGTGTTC  
 AGGACTAAAGCTTGGGACTCTGGTCTAAGGGAGAGACTGGAAGTGGATCCCCGAGTCTGAGCAAGAGAGCTGGG  
 CTGGCTCCCTGGTGAAGCAAGGAGGGCTGAGAGGGCAGGGATCAGGGCTCTGAGGAAGAACTAGCAGGAGGACT  
 CTGTTGAGCTGCTGTCCAGCAGGAGGGGCAAGGAGTGAACCTCTGGGCTCTTTACAGCATGTGGTCTCACTA  
 TCCCTTCTGGATAGGAGGTGAAGCAGTGGCACACCTACCCCACTAGTCCCTCCCAAGTTTATGCCCCAGGCTCTA  
 CTGGCACTAGCCACAGACTGCTGTCCAGCTTGGGAGCTCCAGTGGAAAGGGCCAGGGAGGGGTGAGTGCAGCCCA  
 ACCAAGAGACAGAACCCAGGGCTGGAGGGGAGAGGAGACA
- >Promoter4|sym=Lipe|taxid=10090|spec=Mus musculus|chr=7|ctg=NC\_000073|str=(-)|start=26165828|end=26166428|len=601|comm=Promoter Region  
 CAGTAGAGCGCTGCTGGAATCCCAAGTAGAGGGAGGGGCAAGGCTAGGAACCTAGCCCTGTGCAAGGACTATGT  
 GCACACAGAGACAAAAATTAATACAGATGCATCTTGATTCTCTGGAGGAAAGTTGGTAATCTCGGGTCTTGATTC  
 TTGTAACCTAAAAGCTAAGTACTATAAACATTTATACAGAGGAAAAAATGGAAGCTTTGAGAAAGTCAAGTGTGCA  
 CTCCAGTCTTAATACATGACACCTCCACTATAACACAGCCCACTCCAAGACTACCAGCTTAGGATTGCAACCC  
 TGGATACAGAAAGTGCCTATTCTGAGGGGGTGGTGGTCCGAGCTGCCCTGTCTGGCATCCACACCTCACTGAC  
 GGCCAGGCTTATCTTGGCTCAGGACGCTCTGTCTTGGCTTCTATAGAGTCTGTGGCCCAAGGAGTCTATGC  
 GCAGGAGTGTCTGAGGAGCCCTGGCCAGCTGAGGCTTACTGGCACAGATACCTTGAAGAAGTGAACAATAAAG  
 GACTTGAGCAACTCAGAGCTTCAGACAGCCCGAGATGTC

**Supplemental Figure 7. (A) ROR response elements in the promoter of HSL (B) HSL promoter sequence contained RORE**
